# Supplementary material for: Time-Course Transcriptome Analysis of Aquilegia vulgaris Root Reveals the Cell Wall’s Roles in Salinity Tolerance
Source: MDPI journal article supplement (doi:10.3390/ijms242216450), 2023-11-17
Supplement: s1 [file s1]

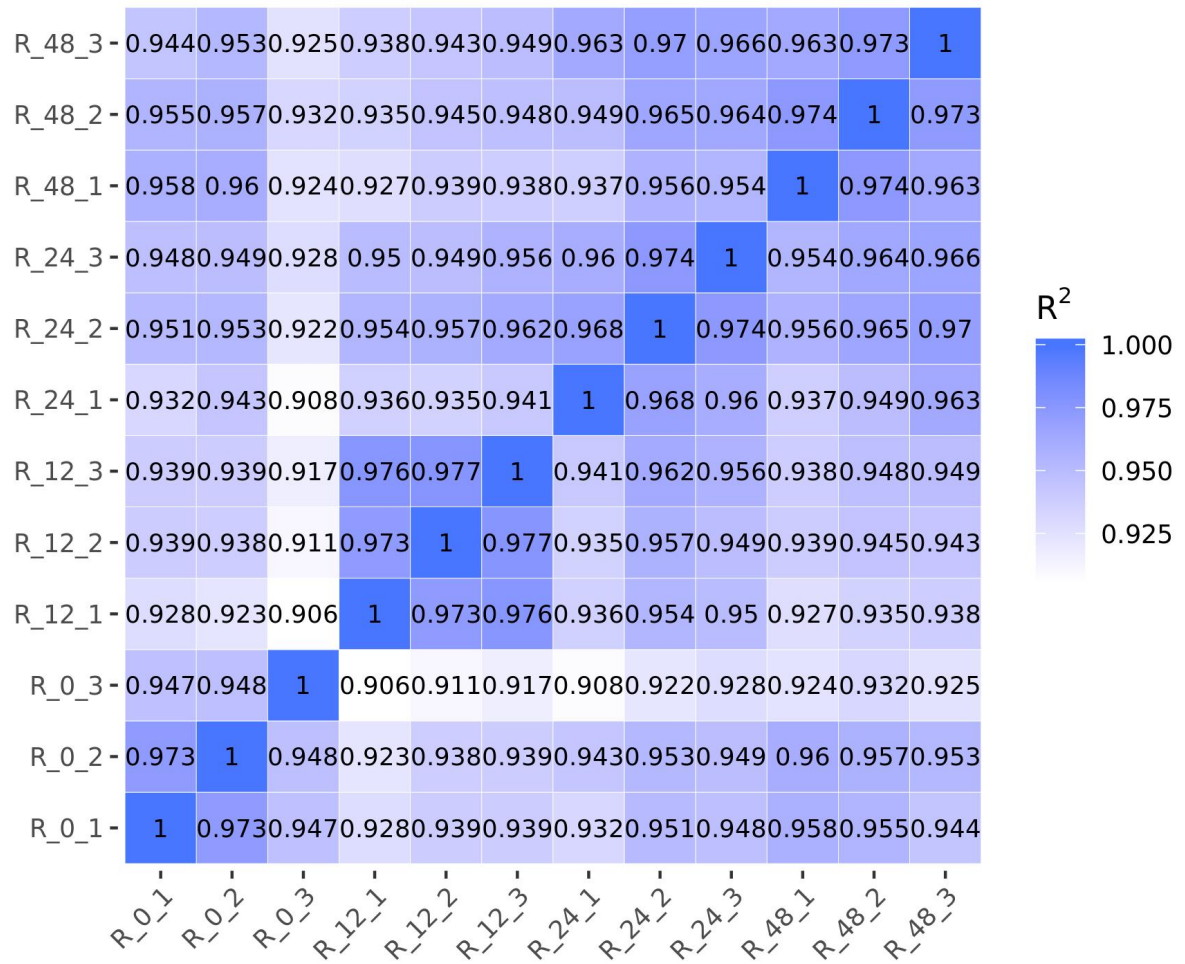

Figure S1. Pearson correlation between samples. The horizontal and vertical coordinates on the graph represent the squared correlation coefficients for each sample.
