# Supplementary material for: Time-Course Transcriptome Analysis of Aquilegia vulgaris Root Reveals the Cell Wall’s Roles in Salinity Tolerance
Source: Int J Mol Sci. 2023 Nov 17;24(22):16450. doi: 10.3390/ijms242216450 (PMC10671252; doi:10.3390/ijms242216450)
Supplement: Supplementary file 1 [file ijms-24-16450-s001.zip › TableS1-S3.xlsx]

## Sheet: Table S1
Table S1. Statistics on transcriptome sequencing data of Aquilegia vulgaris root in response to salt stress.
Sample	Tissue	Time	BioProject numbers	Accession numbers	Raw reads	Clean reads	Clean bases	Q20%	Q30%	GC%
R_0_1	root	0h	PRJNA1035280	SAMN38085952	45420834	44258104	6.64G	98.25	94.54	41.65
R_0_2	root	0h	PRJNA1035280	SAMN38085953	47138428	46133650	6.92G	98.25	94.53	41.62
R_0_3	root	0h	PRJNA1035280	SAMN38085954	46300968	45250580	6.79G	98.45	95.09	41.45
R_12_1	root	12h	PRJNA1035280	SAMN38085955	45784208	44641876	6.70G	98.44	95.02	41.22
R_12_2	root	12h	PRJNA1035280	SAMN38085956	52767826	51175362	7.68G	98.51	95.17	41.24
R_12_3	root	12h	PRJNA1035280	SAMN38085957	45669256	44157640	6.62G	98.41	94.95	41.5
R_24_1	root	24h	PRJNA1035280	SAMN38085958	47420340	46195198	6.93G	98.37	94.84	41.68
R_24_2	root	24h	PRJNA1035280	SAMN38085959	47667860	46131930	6.92G	98.43	95	41.6
R_24_3	root	24h	PRJNA1035280	SAMN38085960	46779256	45804896	6.87G	98.53	95.22	41.61
R_48_1	root	48h	PRJNA1035280	SAMN38085961	51486622	49849156	7.48G	98.45	95.09	40.98
R_48_2	root	48h	PRJNA1035280	SAMN38085962	48892802	47989286	7.20G	97.9	93.64	41.62
R_48_3	root	48h	PRJNA1035280	SAMN38085963	51179090	49536908	7.43G	98.42	94.95	41.71
Note: Q20% is the proportion of base mass value greater than 20; Q30% is the proportion of base mass value greater than 30; GC content is the proportion of G and C bases in the total base in Clean Data.

## Sheet: Table S2
Table S2. Statistics of reference genome comparison results.
sample	Tissue	Time	Total reads	Total map	Unique map
R_0_1	root	0h	44258104	40083168(90.57%)	38848715(87.78%)
R_0_2	root	0h	46133650	42106163(91.27%)	40867128(88.58%)
R_0_3	root	0h	45250580	41215666(91.08%)	39914282(88.21%)
R_12_1	root	12h	44641876	40381351(90.46%)	39210208(87.83%)
R_12_2	root	12h	51175362	46297696(90.47%)	45013509(87.96%)
R_12_3	root	12h	44157640	39634110(89.76%)	38494733(87.18%)
R_24_1	root	24h	46195198	42023359(90.97%)	40751063(88.21%)
R_24_2	root	24h	46131930	42031868(91.11%)	40764955(88.37%)
R_24_3	root	24h	45804896	41902784(91.48%)	40652548(88.75%)
R_48_1	root	48h	49849156	45364158(91.0%)	44087927(88.44%)
R_48_2	root	48h	47989286	43702979(91.07%)	42451856(88.46%)
R_48_3	root	48h	49536908	45291834(91.43%)	43930176(88.68%)
Note: total Reads: the number of clean reads of sequencing data after QC; total Map: the number and percentage of reads compared to the genome; unique Map: the number and percentage of reads compared to the unique position of the reference genome.

## Sheet: Table S3
Table S3. The qRT-PCR primers used in this study
Primer name	Forward primer sequence 5'-3'	Reverse primer sequence 5'-3'
gene-AQUCO_01100377v1	TTGTTGGCGATGTGACTC	GTTCCTGGCTTTGGTGTT
gene-AQUCO_03400209v1	AATGGAAGGGATGGAACT	TGGAAGATGACTTGGCTC
gene-AQUCO_03000036v1	ATCACAACCCAAATCAGC	AAGGAGGAGACAATCAAAGT
gene-AQUCO_03800141v1	TGGAACTGGAGGACTGAT	TGGGCTCTACACTGGATG
gene-AQUCO_10800001v1	TACAGAACAGCACCCAAAG	AATAGCGACCATCACGAC
gene-AQUCO_02700219v1	TATCAAGGCTTGCACATT	GTCTGCTGGTCTAGGAAC
gene-AQUCO_03800142v1	GCAAGCAAATCGGCAAAG	CGAAGCGTACCCGGTGTT
gene-AQUCO_00300259v1	CTTGCCTATGATGGCTGGTG	GTTGGGTAATTGTGCATTTGTG
gene-AQUCO_03400013v1	TTTCTACGCAGCAGTCGC	GATTGGGCATTGGCAGTT
IPP2	CAGGTGAAGACGGACTGAAGTTATC	CCAAGACTGGAAAAAAGACCACAC
