# Supplementary figures and images for: Time-Course Transcriptome Analysis of Aquilegia vulgaris Root Reveals the Cell Wall’s Roles in Salinity Tolerance
Source: MDPI journal article supplement (doi:10.3390/ijms242216450), 2023-11-17

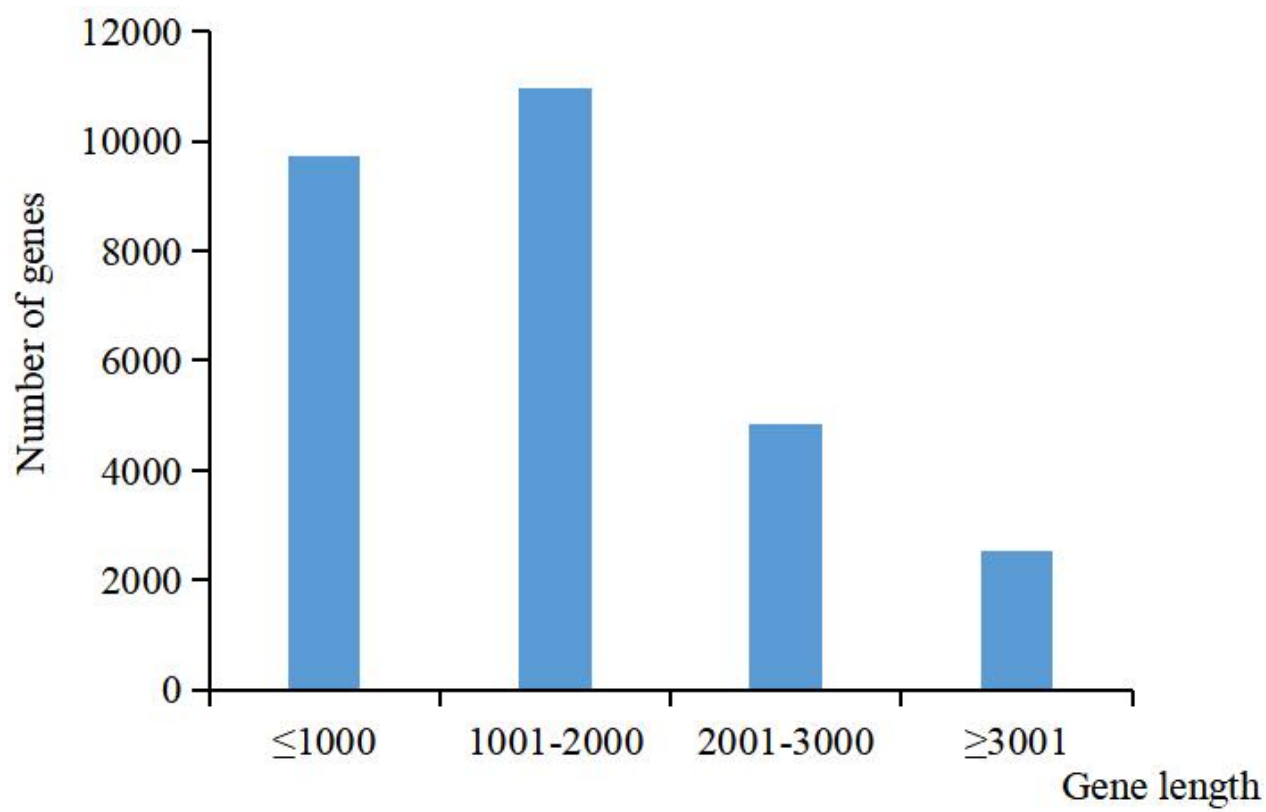

Figure S2. Length distribution of assembled Unigenes.

Supplement: s1 [file s1]
